# Supplementary material for: Diversity and Functional Evolution of Terpene Synthases in Dictyostelid Social Amoebae
Source: PubMed Central journal article supplement (PMC6156593; doi:10.1038/s41598-018-32639-0), 2018-09-25
Supplement: 41598_2018_32639_MOESM1_ESM.pdf [file 41598_2018_32639_MOESM1_ESM.pdf]

## Diversity and Functional Evolution of Terpene Synthases in Dictyostelid Social Amoebae

Xinlu Chen, Tobias G. Köllner, Gad Shaulsky, Qidong Jia, Jeroen S. Dickschat, Jonathan Gershenzon & Feng Chen

**Table S1. List of terpene synthase genes from *Dictyostelium lacteum***

| Gene name | Gene ID    | location                       | Protein size | Number of introns |
|-----------|------------|--------------------------------|--------------|-------------------|
| DITPS1    | DLAC_07096 | LODT01000031.1:625710-626848   | 354          | 1                 |
| DITPS2    | DLAC_10965 | LODT01000051.1:c207457-206420  | 345          | 0                 |
| DITPS3    | DLAC_05221 | LODT01000025.1:c629567-628551  | 338          | 0                 |
| DITPS4    | DLAC_02702 | LODT01000013.1:c532509-531535  | 324          | 0                 |
| DITPS5    | DLAC_05826 | LODT01000028.1:1030493-1031416 | 308          | 0                 |
| DITPS6    |            | LODT01000028.1:1031498-1032448 | 317          | 0                 |
| DITPS7    |            | LODT01000028.1:1032728-1033668 | 279          | 1                 |

**Table S2 Primers used for full-length cDNA cloning**

| Gene Name      | Primers | Sequences                                |
|----------------|---------|------------------------------------------|
| <i>DpTPS1</i>  | Forward | 5'-ATGTCATTATCATTAAGCGATATTAATTC-3'      |
|                | Reverse | 5'-TTAATTTATAATTTCTCTGGTGGTAAAATG-3'     |
| <i>DpTPS2</i>  | Forward | 5'-ATGAATTTAACACTTAAAGATTTTCATG-3'       |
|                | Reverse | 5'-TTATAGTTCATTATTGATTAATTTATTATC-3'     |
| <i>DpTPS3</i>  | Forward | 5'-ATGCAAAAAGAAATTTATTATACATTTGAC-3'     |
|                | Reverse | 5'-TTAATGATTTAAATTATAACGTGGGTAG-3'       |
| <i>DpTPS4</i>  | Forward | 5'-ATGAATAGCTTAGCAAACAATGGC-3'           |
|                | Reverse | 5'-TTATATCCAAAATATATCAGGTGTTAAAATTG-3'   |
| <i>DpTPS5</i>  | Forward | 5'-ATGCAAGAAAACCAAATCTTTTAAG-3'          |
|                | Reverse | 5'-TTAATAAAGATTTGAATTTAAGATCTTTTC-3'     |
| <i>DpTPS6</i>  | Forward | 5'-ATGAAACAACATATACTTTGGGATTTAAATAAC-3'  |
|                | Reverse | 5'-TTATTTATAACGGTTACAGATTGAAGAGAC-3'     |
| <i>DpTPS7</i>  | Forward | 5'-ATGCAAGAAAATCAAGAGTGTCAAATG-3'        |
|                | Reverse | 5'-TTATTTATAATCAGCTTCACAAACAGTG-3'       |
| <i>DpTPS8</i>  | Forward | 5'-ATGCAAGAAGAAATATTATACAAATGGAATTATG-3' |
|                | Reverse | 5'-TTATTCATTAATAATCTTTAATTCAGCTTC-3'     |
| <i>DpTPS9</i>  | Forward | 5'-ATGTCTCTATCTTTTAAAAATATAGTTTTTC-3'    |
|                | Reverse | 5'-TTATAAACTGGAGGCATCTATTCATTATC-3'      |
| <i>DpTPS10</i> | Forward | 5'-ATGGAAGCTATAAAACAAAAAGAAG-3'          |
|                | Reverse | 5'-TCATCGAAAAAATGTTTTATGTTGGAC-3'        |
| <i>DpTPS11</i> | Forward | 5'-ATGGATATAAATAAACAAAAACCAAATG-3'       |
|                | Reverse | 5'-TTAATTATTTTTATTGATATAGTTTTTGTTG-3'    |
| <i>DpTPS12</i> | Forward | 5'-ATGTATTCTTTATTTAAAAATATAAAATTC-3'     |
|                | Reverse | 5'-CTAACCAAATAATGATTTAGTATTTAAATAAG-3'   |
| <i>AsTPS1</i>  | Forward | 5'-ATGTCACTATCTTTAAATGATATCAAATTC-3'     |
|                | Reverse | 5'-TTAAGCCTCACGGAACCTTCTCATTC-3'         |
| <i>DfTPS1</i>  | Forward | 5'-ATGTTATCATTAAACGAAATCAAGTTTC-3'       |
|                | Reverse | 5'-CTAAAGTTTGGACATCAAGTTCCTTG-3'         |
| <i>DITPS1</i>  | Forward | 5'-ATGTCACTGTCACTTAATGATATTAATTC-3'      |
|                | Reverse | 5'-TTATACTCTTTTCTTTCTTTAAGTCTC-3'        |
| <i>PpTPS18</i> | Reverse | 5'-ATGTTGCCTTAAACGAAATCAAATTC-3'         |
|                | Reverse | 5'-TTATAGATAGCTTTTCGAGGGAGGTC-3'         |

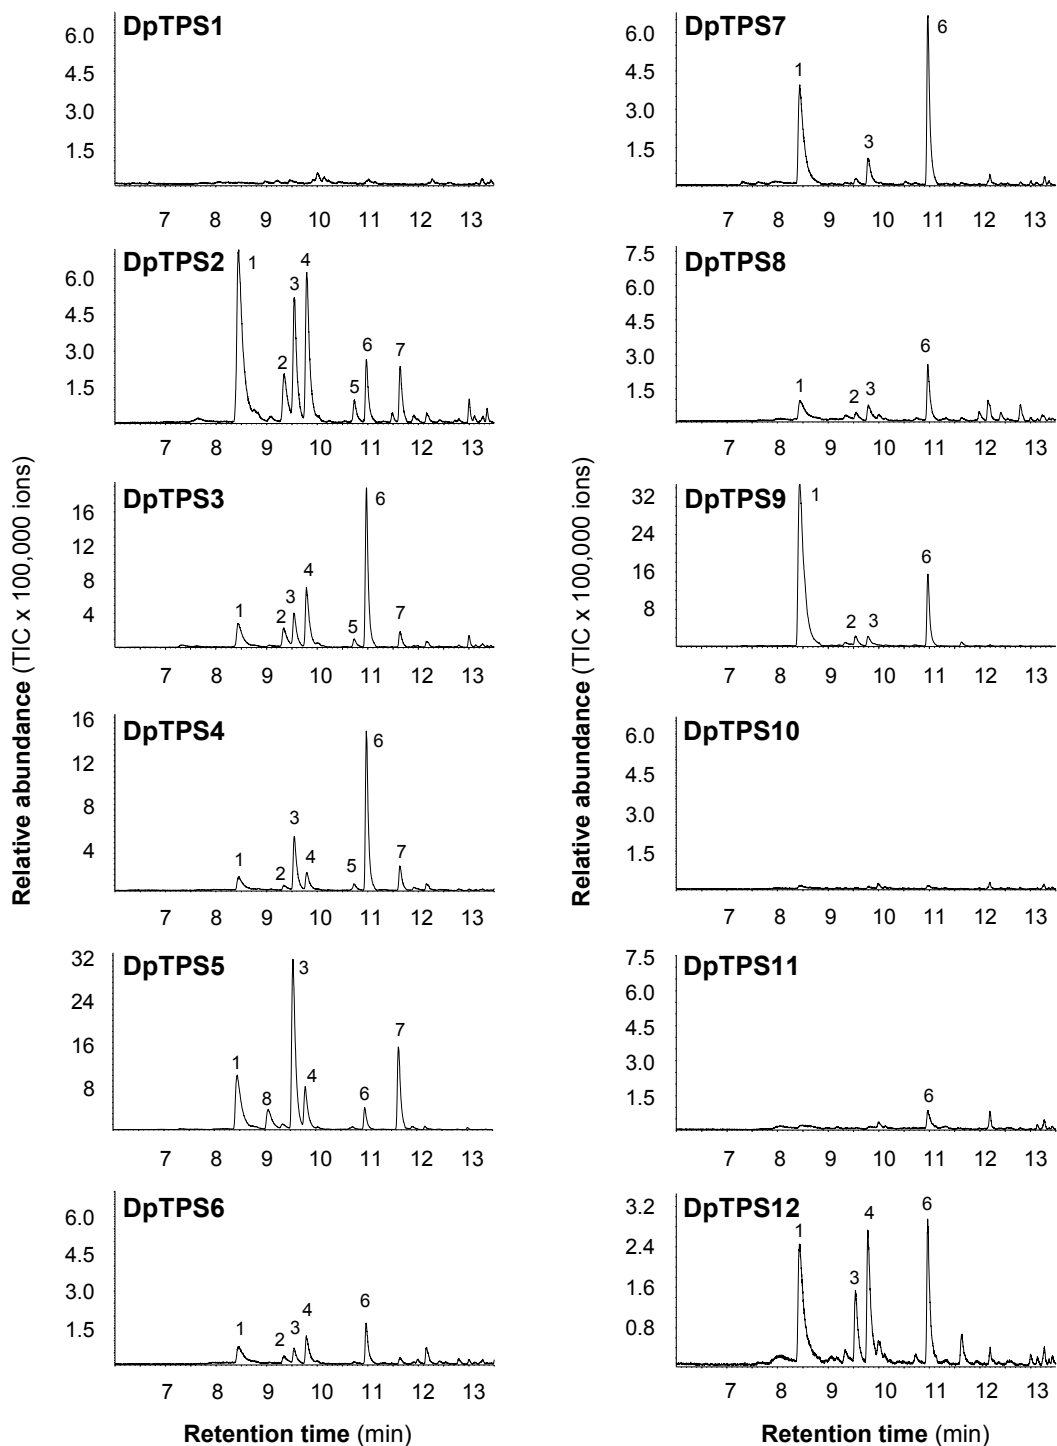

**Figure S1. Monoterpene products of *Dictyostelium purpureum* terpene synthases.** The *TPS* genes were heterologously expressed in *Escherichia coli* and crude protein extracts were incubated with the substrate GPP in the presence of 10 mM Mg<sub>2</sub>Cl as cofactor. The produced monoterpenes were collected from the headspace of the assays using solid-phase microextraction and were analyzed with gas chromatography/mass spectrometry. 1, β-myrcene\*; 2, limonene\*; 3, (*Z*)-β-ocimene; 4, (*E*)-β-ocimene; 5, terpinolene\*; 6, linalool\*; 7, neo-allo-ocimene; 8, α-terpinene\*.

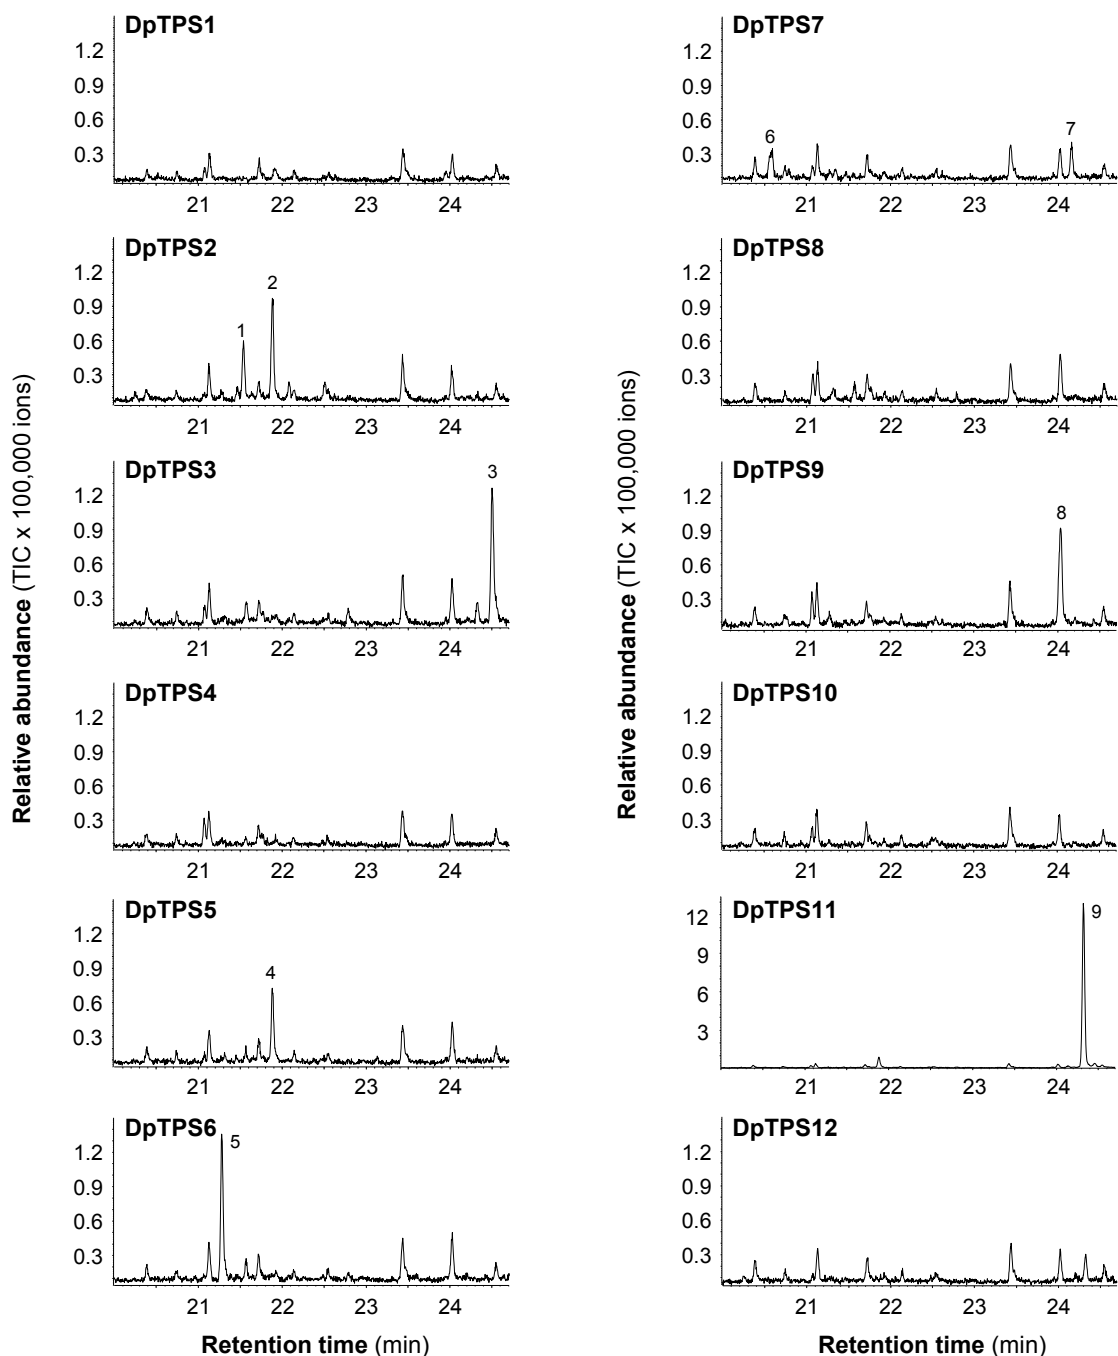

**Figure S2. Diterpene products of *Dictyostelium purpureum* terpene synthases.** The *TPS* genes were heterologously expressed in *Escherichia coli* and crude protein extracts were incubated with the substrate GGPP in the presence of 10 mM  $Mg_2Cl$  as cofactor. The produced diterpenes were extracted from the assays with hexane and were analyzed using gas chromatography/mass spectrometry. 1+2, unidentified DTs; 3+4, unidentified oxygenated DTs; 5+6, unidentified DTs; 7-9, unidentified oxygenated DTs; DT, diterpene hydrocarbon. Non-labeled peaks are contaminations.

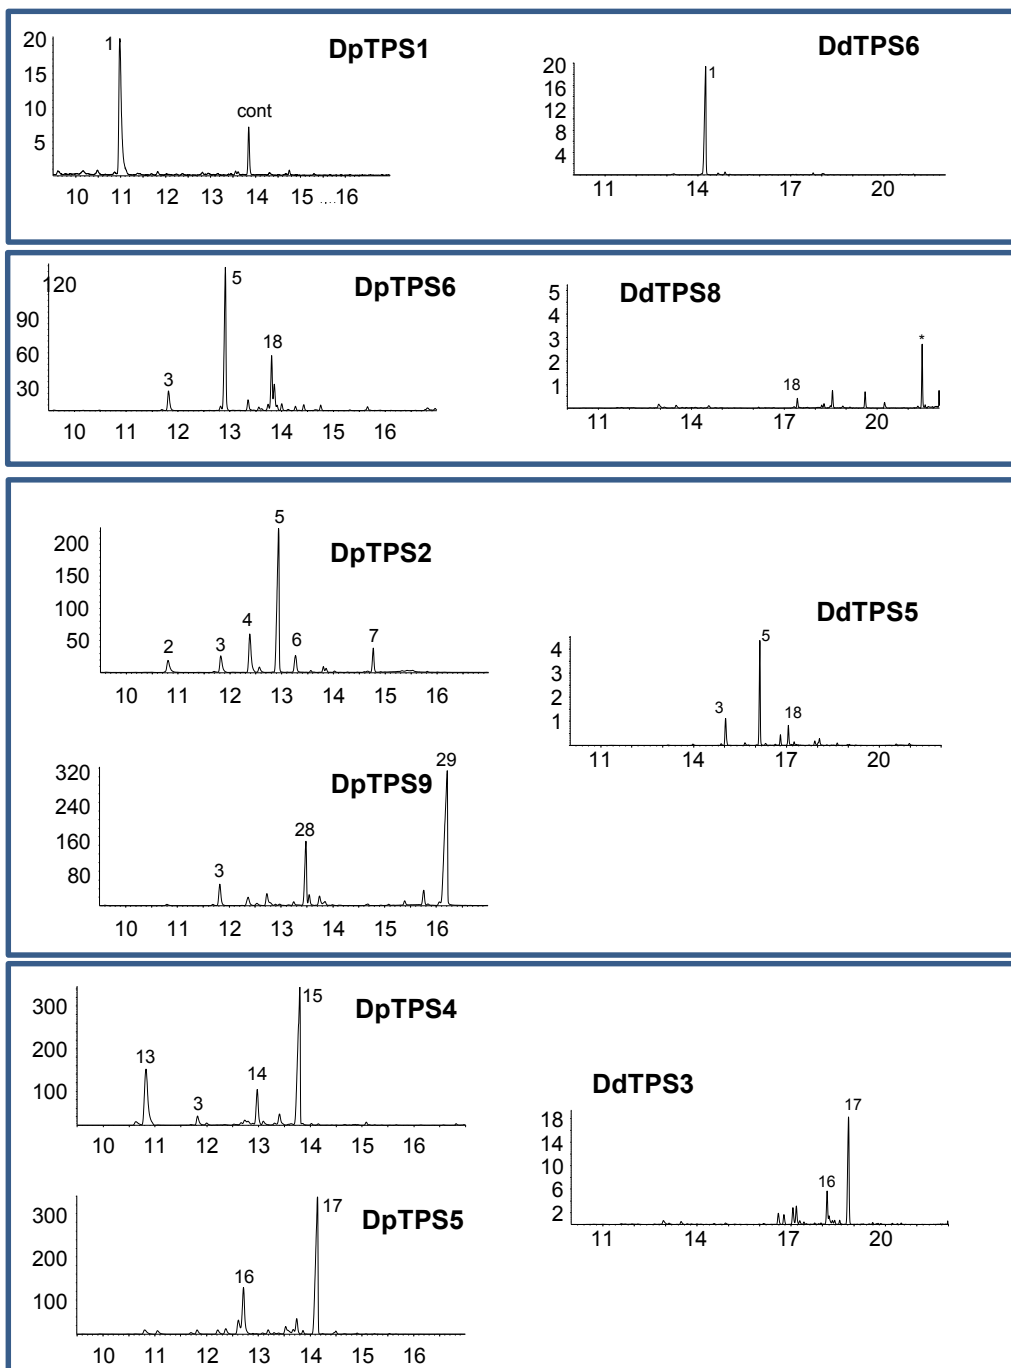

**Figure S3. Comparison of sesquiterpene products of four putative orthologous groups of terpene synthases from *D. purpureum* (DpTPS) and *D. discoideum* (DdTPS).** The compound numbers follow the same scheme as presented in Figure 2. "\*" represents an unidentified sesquiterpene.

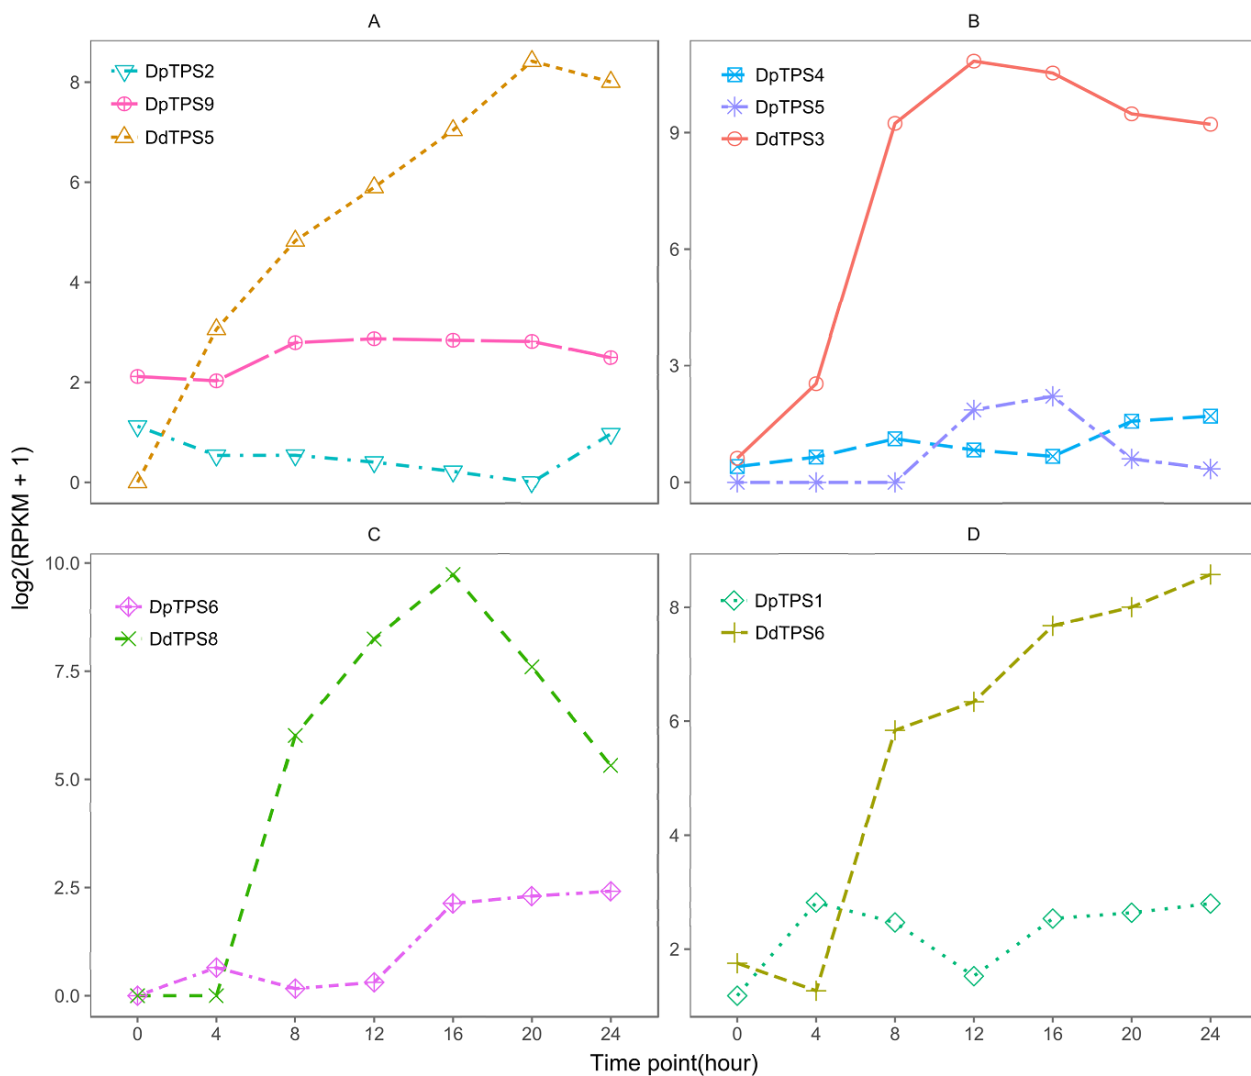

**Figure S4. Comparison of expression patterns of four putative orthologous pairs/groups of terpene synthase genes between *D. purpureum* and *D. discoideum* during 24 hour development.** Expression of TPS genes was measured by RPKM (reads per kilobase per million sequenced reads) based on RNA-Seq data produced from web-based interface program (<http://dictyexpress.biolab.si/>) and then displayed on a  $\log_2(\text{RPKM}+1)$  scale in this line plot.
